# Supplementary material
Source: Springer Nature journal article supplement (https://www.springermedizin.de/resource/supplementary/13054_2013_2560_MOESM3_ESM.pdf/9714188)

**Figure 3: Updated validation model's calibration, observed versus predicted outcomes**

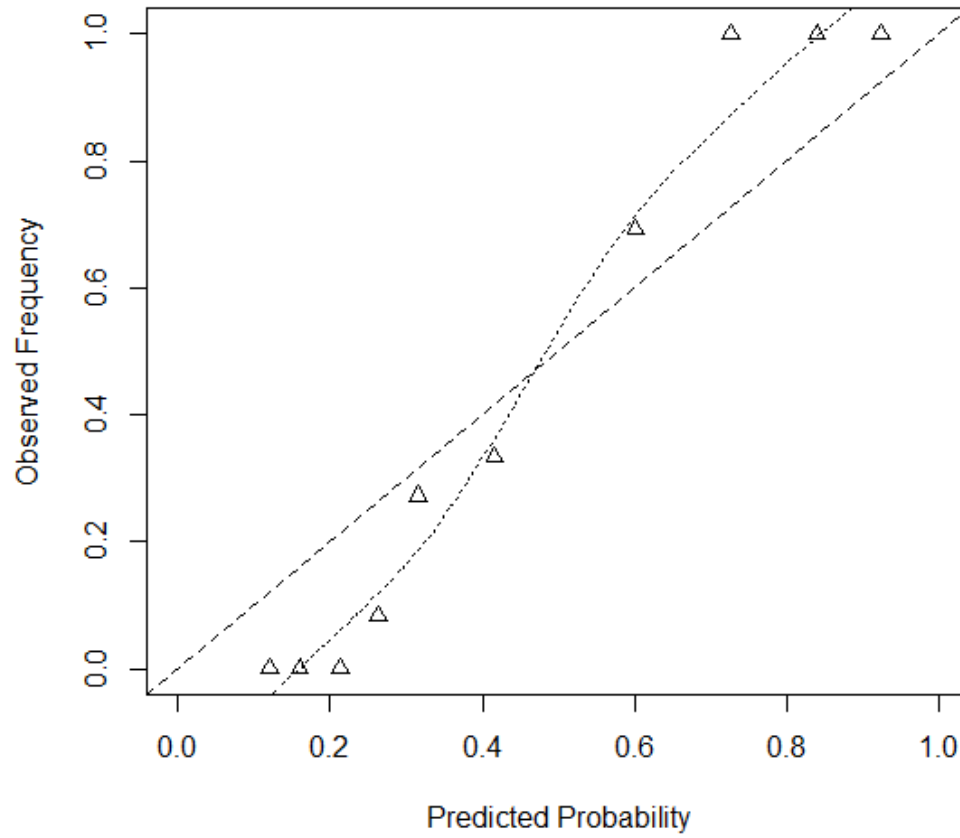

Supplement: MOESM3 [file 9714188]
